# Supplementary material for: RNA-seq analysis of the Rhizobium tropici CIAT 899 transcriptome shows similarities in the activation patterns of symbiotic genes in the presence of apigenin and salt
Source: PubMed Central journal article supplement (PMC4782375; doi:10.1186/s12864-016-2543-3), 2016-03-08

**Supplementary file 1. General features of the total sequenced and mapped reads.**

**Total Number of Reads:** Reads were mapped using a Bayesian inference using Cufflinks v2.11 software. Worst quality reads were removed by means of Picard Tools.

| Sample condition | #Mapped Reads |
|------------------|---------------|
| CIAT_1           | 176338004     |
| CIAT_2           | 65464444      |
| CIAT_APIG_1      | 210875582     |
| CIAT_APIG_2      | 67786472      |
| CIAT_SALT_1      | 172542528     |
| CIAT_SALT_2      | 54981832      |

Two biological and independent experiments were carried out for each condition.

**Quality Read Controls:** Three different controls were performed to ensure the quality of reads: GC content, duplicate distribution and distribution respect genetic coordinates.

- *GC content:* distribution of GC content on mapped reads. A normal distribution around 45-55% is expected.

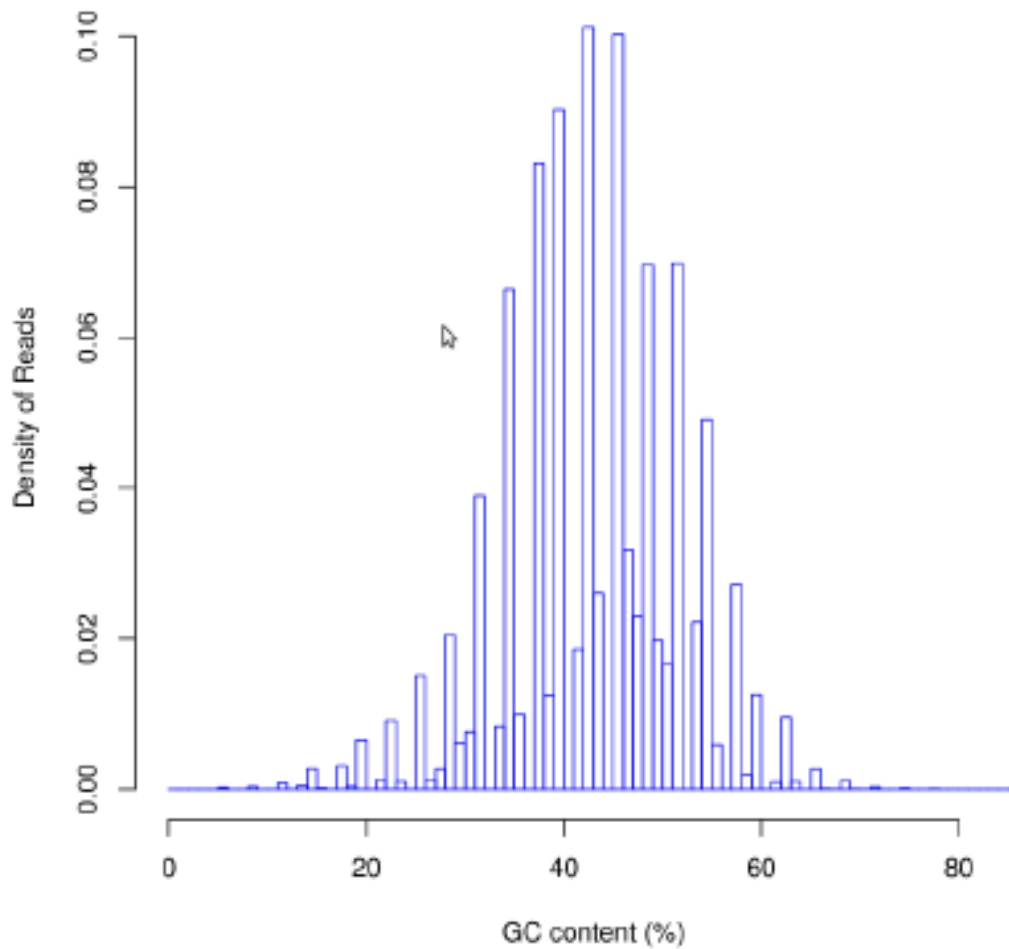

- *Duplicate distribution*: common distribution of duplicates in a RNA-Seq experiment shows a small number of reads with high levels of duplicates and a high number of reads with low levels of duplicates. All samples presented optimal values of duplicate distributions.

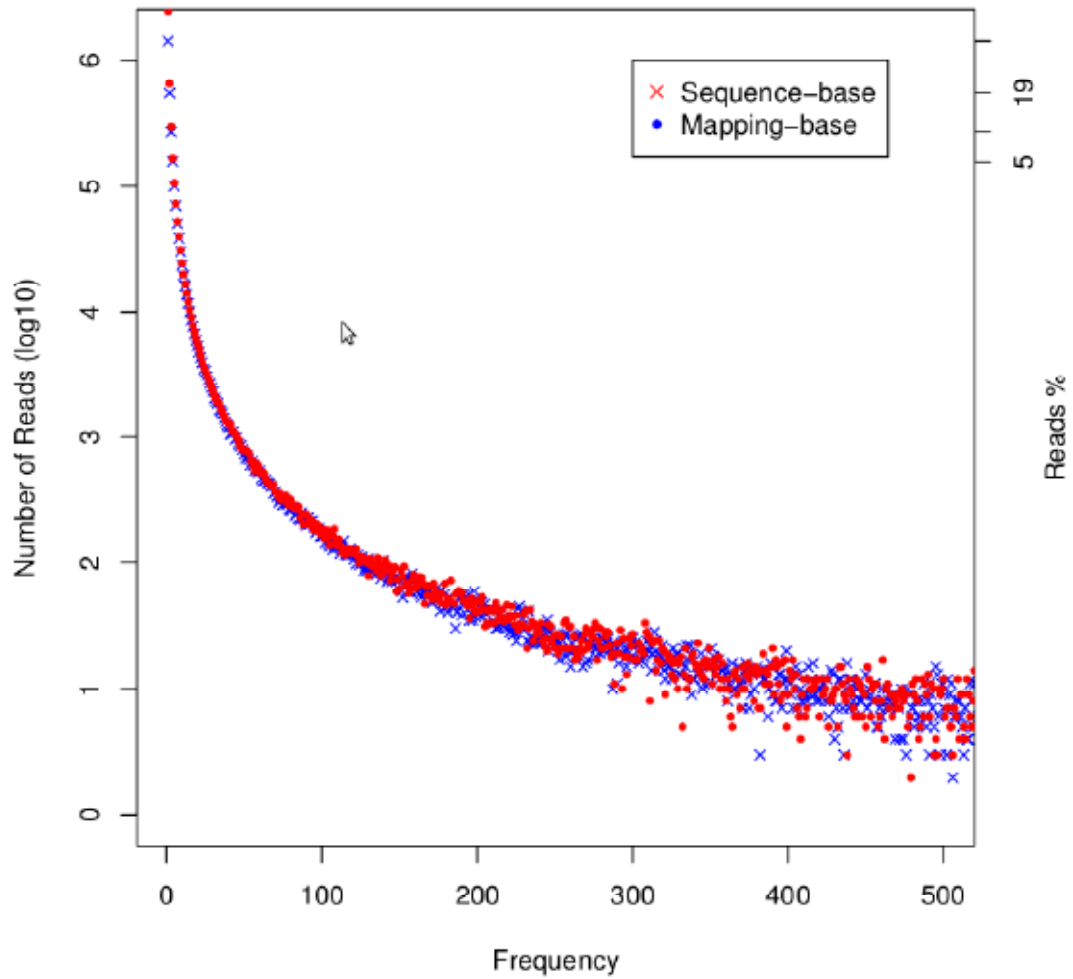

- *Distribution respect genetic coordinates*: centralization around 50 percentile of gene body is expected in high quality samples. Read concentration in both ends could be indicative of RNA degradation.

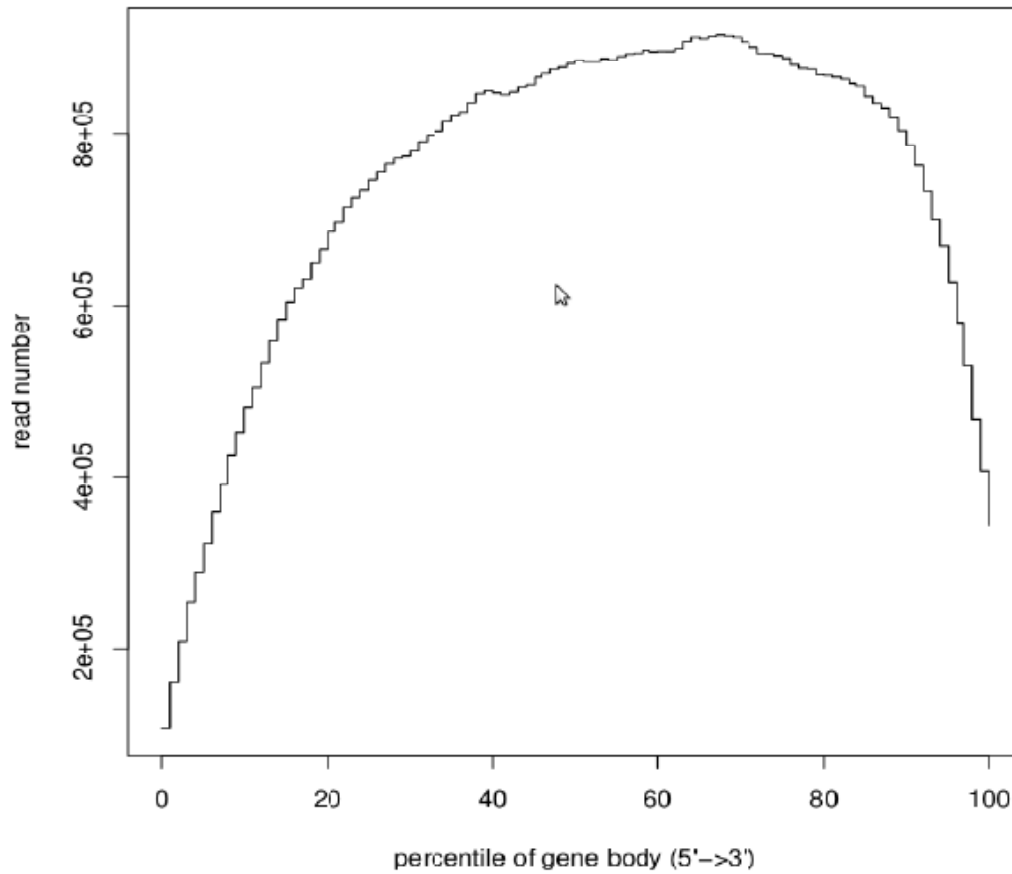

**Normalization:** normalization is needed to avoid statistical deviations due to differences in library sizes.

Number of reads per gene for control and apigenin samples **before** normalization.

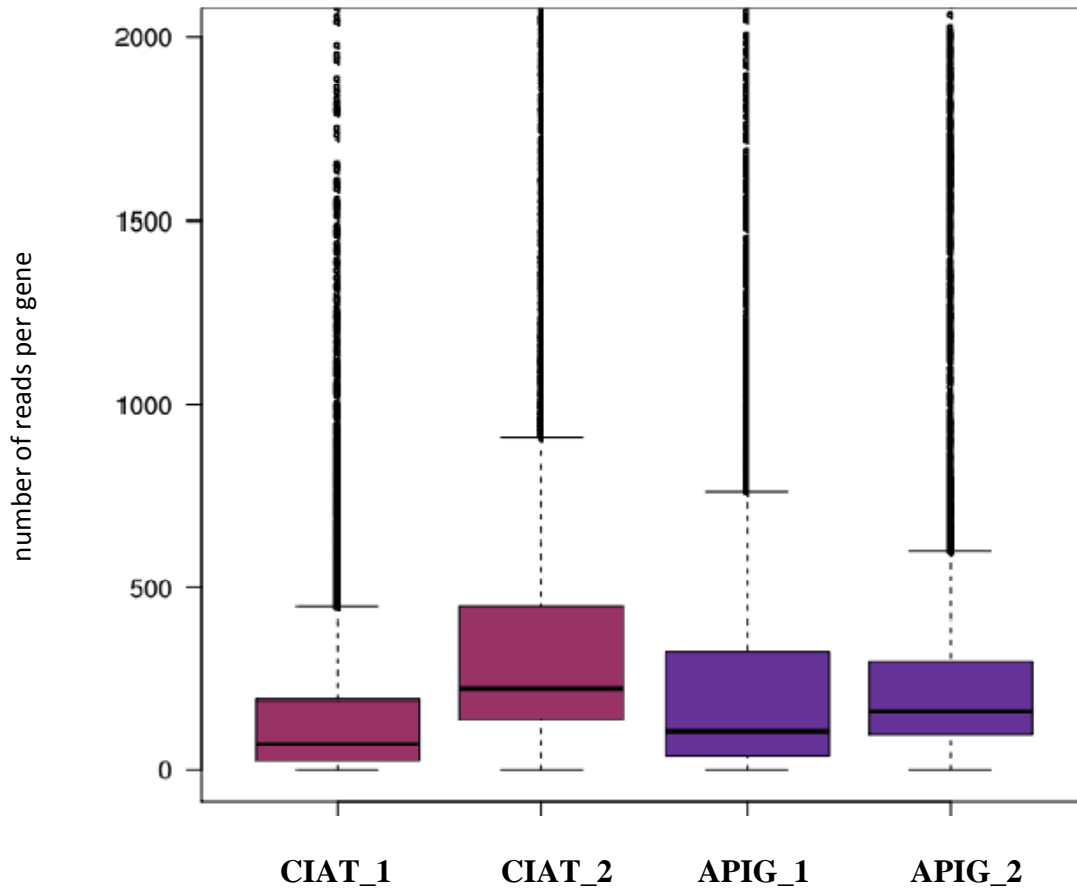

Number of reads per gene for control and salt samples **before** normalization.

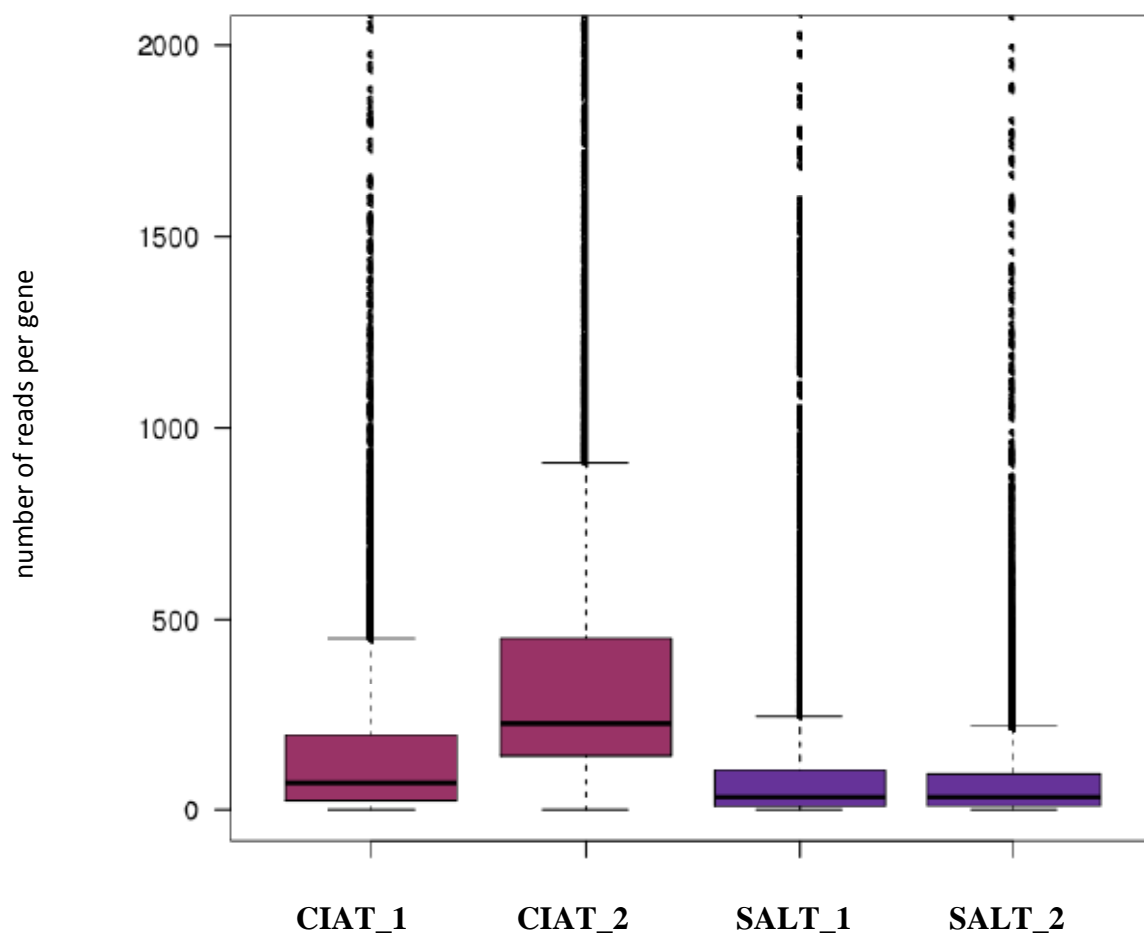

Number of reads per gene for control and apigenin samples **after** normalization.

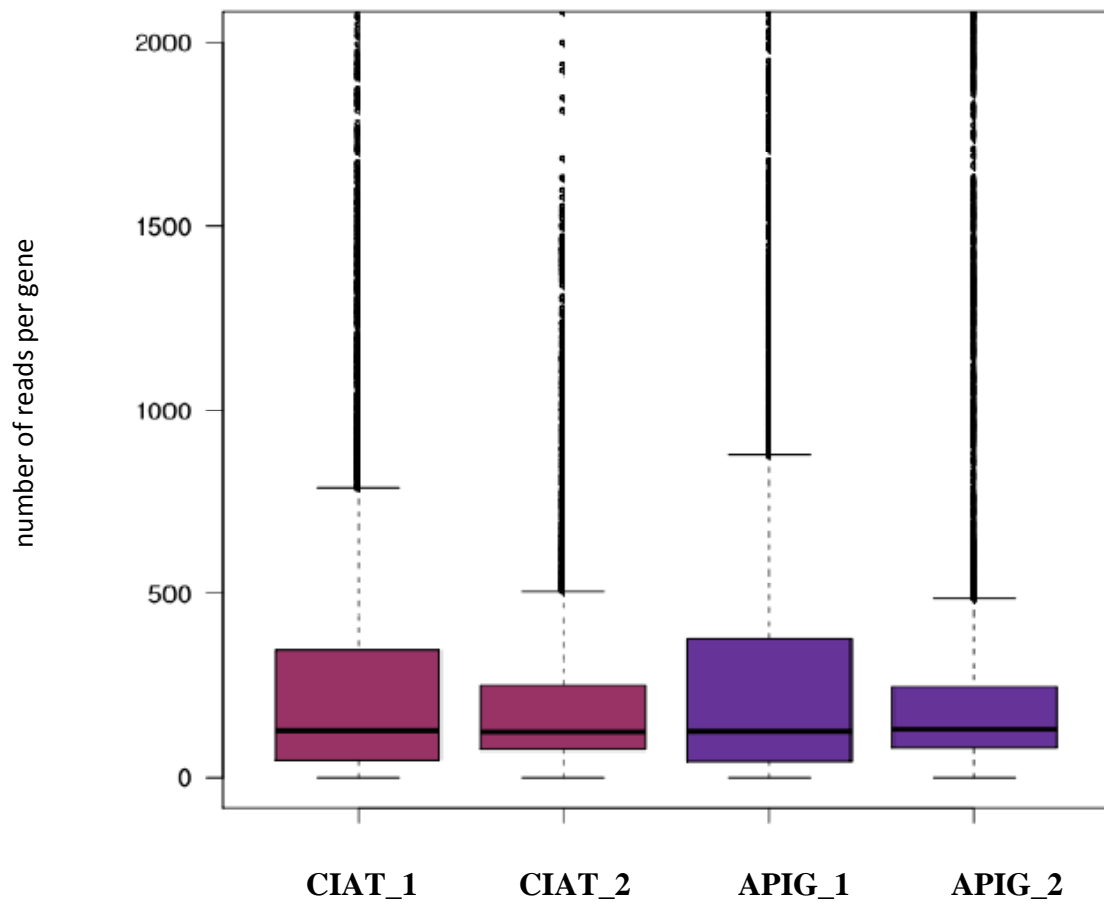

Number of reads per gene for control and salt samples **after** normalization.

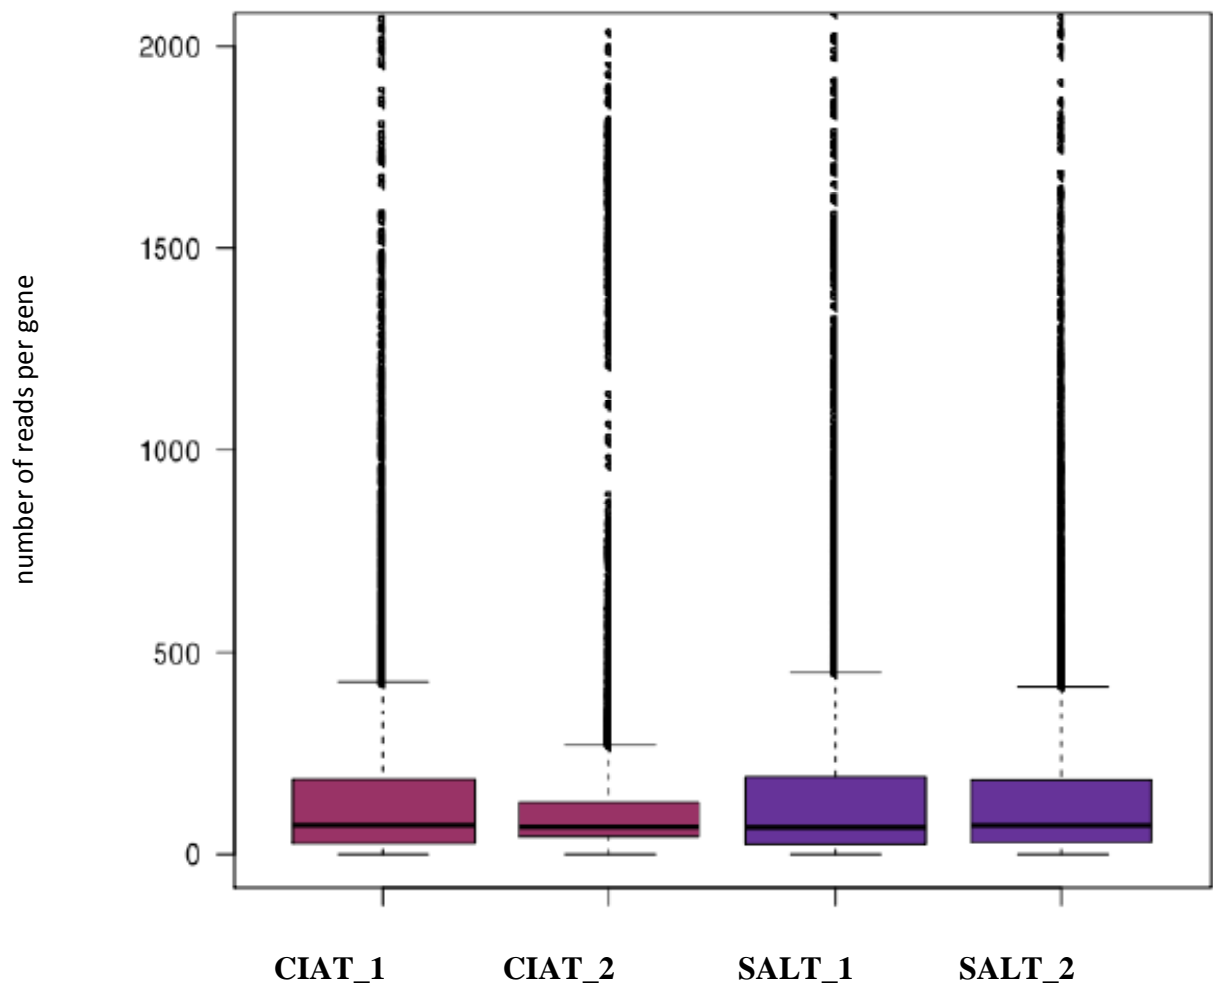

Supplement: 12864_2016_2543_MOESM1_ESM.pdf [file 12864_2016_2543_MOESM1_ESM.pdf]
